# Supplementary material for: Genome-wide identification of GH3 genes in Brassica oleracea and identification of a promoter region for anther-specific expression of a GH3 gene
Source: PubMed Central journal article supplement (PMC7789250; doi:10.1186/s12864-020-07345-9), 2021-01-06

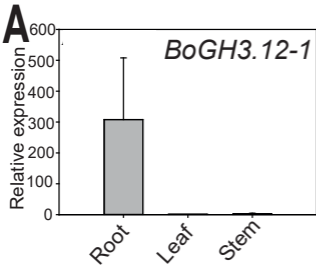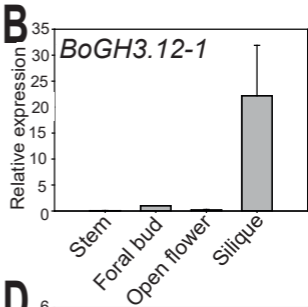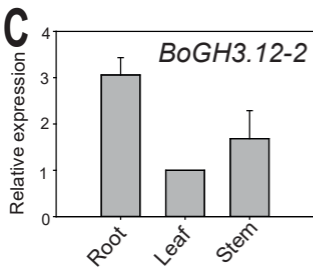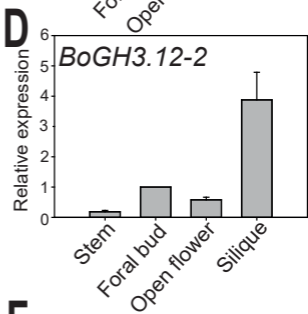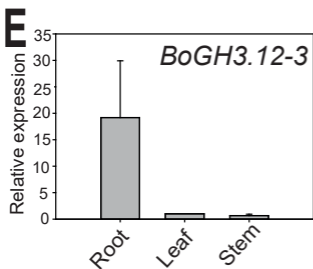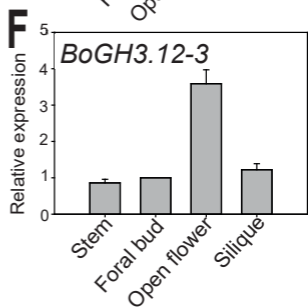

Supplement: 12864_2020_7345_MOESM7_ESM.pdf [file 12864_2020_7345_MOESM7_ESM.pdf]
