# Supplementary material for: Genome-wide identification of GH3 genes in Brassica oleracea and identification of a promoter region for anther-specific expression of a GH3 gene
Source: PubMed Central journal article supplement (PMC7789250; doi:10.1186/s12864-020-07345-9), 2021-01-06

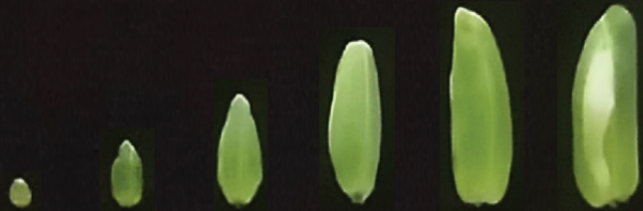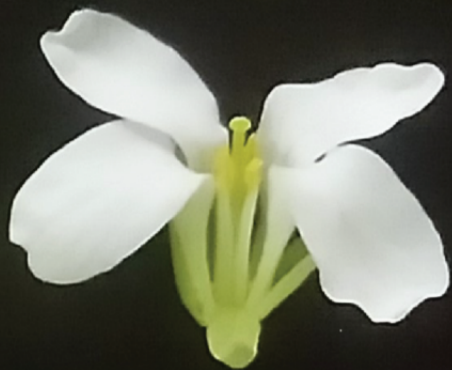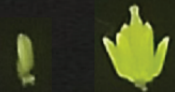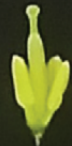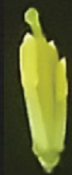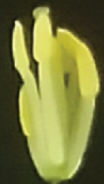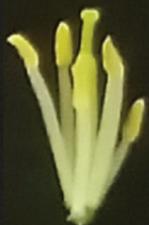

1 mm

3 mm

5 mm

7 mm

9 mm  
(unopened)

9 mm  
(opened)

Opened  
flower

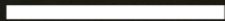

Supplement: 12864_2020_7345_MOESM8_ESM.pdf [file 12864_2020_7345_MOESM8_ESM.pdf]
